# Supplementary material for: Evaluation of the BD Phoenix CPO Detect Panel for Detection and Classification of Carbapenemase Producing Enterobacterales
Source: MDPI journal article supplement (doi:10.3390/antibiotics12071215), 2023-07-21
Supplement: s1 [file s1]

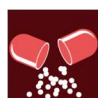

## Supplementary Materials

**Table S1.** Carbapenemase detection and Ambler classification by BD Phoenix CPO detect panel.

| Strain ID | CP Gene (PCR) | Bacterial Species           | CPO Detect Panel (#1)            | CPO Detect Panel (#2) | CPO Detect Panel (#3)                                            |
|-----------|---------------|-----------------------------|----------------------------------|-----------------------|------------------------------------------------------------------|
| HL 848    | VIM           | <i>Klebsiella oxytoca</i>   | Extended Spectrum Beta-lactamase |                       | Class B Carbapenemase Producer, Extended Spectrum Beta-lactamase |
| HL 1070   | OXA-48-like   | <i>Citrobacter freundii</i> | No CRE                           | No CRE                | No CRE                                                           |

CRE, Carbapenem-resistant *Enterobacterales*.

**Table S2.** Carbapenemase susceptibility testing by BD Phoenix CPO detect panel and MicroScan.

| Strain ID | CP Gene (PCR) | Bacterial Species           | CPO Detect Panel (#1) |          |           | CPO Detect Panel (#2) |          |           |
|-----------|---------------|-----------------------------|-----------------------|----------|-----------|-----------------------|----------|-----------|
|           |               |                             | Ertapenem             | Imipenem | Meropenem | Ertapenem             | Imipenem | Meropenem |
| HL 848    | VIM           | <i>Klebsiella oxytoca</i>   | >1, R                 | 2, I     | 0.5, S    | >1, R                 | 4, R     | 2, I      |
| HL 1070   | OXA-48-like   | <i>Citrobacter freundii</i> | 0.5, S                | 2, I     | ≤0.25, S  | ≤0.25, S              | 2, I     | ≤0.25, S  |

  

|         |             | Bacterial Species         | MicroScan (#1) |          |           | MicroScan (#2) |          |           |
|---------|-------------|---------------------------|----------------|----------|-----------|----------------|----------|-----------|
|         |             |                           | Ertapenem      | Imipenem | Meropenem | Ertapenem      | Imipenem | Meropenem |
| HL 1070 | OXA-48-like | <i>Klebsiella oxytoca</i> | 0.5, S         | 1, S     | ≤0.25, S  | 1, I           | 2, I     | ≤1, S     |

S, susceptible; I, intermediate; R, resistant.
